# Supplementary material
Source: HighWire-hosted journal article supplement (https://bmjopen.bmj.com/content/8/11/e023749)
Supplement: inline-supplementary-material-1 [file inline-supplementary-material-1.pdf]

## Appendix 1, Excerpt A

**Abbreviations:** Phys1-3: Physicians from internal medicine department, EDphys1-2: Physicians working in the emergency department, EDnurse1-3: Nurses working in the emergency department, AN: Anaesthetist, NurseAN: Nurse anaesthetist.

**Transcript key:** X: word not audible, XX: words not audible, [words]<sup>2</sup>: overlapping speech (the numbers indicate the order of the nearby overlap), -: unfinished words or sentences, (.): micropause, (3): seconds pause, @: laughter.

**Situation:** Patient is < 40 years old. Indication for hospital admission: cardiac arrest. Cardiopulmonary resuscitation (CPR) was performed and return of spontaneous circulation (ROSC) occurred prior to hospital transport. The patient was unconscious and breathing inadequately at ED arrival. Team-members are separated in two “working-groups” during this phase of work; ED nurse 1, nurse anaesthetist, ED physician 1, and the anaesthetist are all involved in patient related practical tasks (ECG, suctioning, establishing an arterial line and sedation), while ED physician 1, physicians 1, 2, and 3 from internal medicine, and ED nurse 2 are standing next to the logging-desk. Physician 3 is standing in a small distance from the latter group answering his telephone.

### Part 1, before the anaesthetist’s involvement in the CT decision.

| Utterance number | Speaker | Utterance                                                             | Speakers actions                                                | Other actions                                                           |
|------------------|---------|-----------------------------------------------------------------------|-----------------------------------------------------------------|-------------------------------------------------------------------------|
| 276              | Phys3   | Yes. He is going to have a head CT-scan down here now. Is he?         | Stands next to Phys1 and looks at Phys2.<br>Holds phone to ear. |                                                                         |
| 277              | EDphys1 | Yes.                                                                  | Standing outside the video frame                                | Phys3 and EDphys2 looks in direction of EDphys1. Phys2 shakes her head. |
| 278              | Phys2   | Is he?                                                                | Shakes head. Turns towards EDphys1.                             |                                                                         |
| 279              | EDphys1 | Don’t you think so?                                                   |                                                                 |                                                                         |
| 280              | Phys2   | Why? (1) [Get him up to the ICU. Get him up to the ICU.] <sup>4</sup> | Shakes head. Turns towards EDphys1.                             | Phys1 turns towards EDphys1 and nods.                                   |

|     |         |                                                                |                                                                                                         |                                                                 |
|-----|---------|----------------------------------------------------------------|---------------------------------------------------------------------------------------------------------|-----------------------------------------------------------------|
| 281 | Phys3   | [No, he doesn't have any X indication XX] <sup>4</sup>         | Talks on the telephone, turns and walks away from the bed.                                              |                                                                 |
| 282 | EDphys1 | Well-                                                          |                                                                                                         | Phys1's eyes follow the conversation between EDphys1 and Phys2. |
| 283 | Phys2   | Or-? Don't you think XX?                                       | Walks backward towards EDphys1.<br><br>Stands next to EDphys1.                                          |                                                                 |
| 284 | EDphys1 | Are we- Are we [100 % sure that] <sup>5</sup> it is the heart? |                                                                                                         |                                                                 |
| 285 | NurseAN | [X suction X X.] <sup>5</sup>                                  | Works with the patient's endotracheal tube. Moves to the patient-monitor and fetches the suction device |                                                                 |
| 286 | Phys2   | Jaah 100 (.) [but ] <sup>6</sup>                               | Looks at Phys1.                                                                                         | EDnurse1 looks at display on the ECG device                     |
| 287 | EDphys1 | [It] <sup>6</sup> isn't hypoxia -                              | Standing outside the video frame                                                                        | Phys1 and Phys2 are standing together with EDphys1.             |

|            |                                                                                                        |                                                                                                                                |                                                                                                                 |                                                                                                                                              |
|------------|--------------------------------------------------------------------------------------------------------|--------------------------------------------------------------------------------------------------------------------------------|-----------------------------------------------------------------------------------------------------------------|----------------------------------------------------------------------------------------------------------------------------------------------|
| 288        | Phys2                                                                                                  | Yes, but you have this and this. I don't know myself, but anyway that XX CT [already.] <sup>7</sup>                            | Standing at the edge of the image. Looks at EDphys1 and ((points)) twice at something lying on the logging desk | Phys1 looks at Phys2 and nods.                                                                                                               |
| 289        | EDphys1                                                                                                | [But we] <sup>7</sup> we would [like to have a XX] <sup>8</sup>                                                                |                                                                                                                 | NurseAN suctions secretion from the patient's mouth. AN is positioned close to the patients' right wrist - tries to insert an arterial line. |
| 290        | EDnurse1 is commenting on carrying out the ECG-test                                                    |                                                                                                                                |                                                                                                                 |                                                                                                                                              |
| 291        | Phys2                                                                                                  | Not necessarily a clear suspicion of that. (1) [Not because we have any clear suspicion of what it is then, but-] <sup>9</sup> |                                                                                                                 |                                                                                                                                              |
| 292<br>293 | NurseAN informs AN about the patient's moving his arm and AN to decides to give the patient a sedative |                                                                                                                                |                                                                                                                 |                                                                                                                                              |
| 294        | Phys2                                                                                                  | You can [investigate but I XX up to the ICU myself.] <sup>11</sup><br><br>Do you want to get him to CT-scanning?               | Looks at Phys3.                                                                                                 | Phys1 looks at Phys2 while she is talking.<br><br>Then turns toward Phys3. Phys3 nods his head.                                              |
| 295        | NurseAN asks for confirmation on AN's ordination                                                       |                                                                                                                                |                                                                                                                 |                                                                                                                                              |

|                                                                         |         |                                                                                                     |                                                                                                                |                                                                                 |
|-------------------------------------------------------------------------|---------|-----------------------------------------------------------------------------------------------------|----------------------------------------------------------------------------------------------------------------|---------------------------------------------------------------------------------|
| 296                                                                     | Phys3   | No. [I don't want] <sup>12</sup> to interfere in that decision at all.                              | Looks at Phys2.                                                                                                |                                                                                 |
| 297                                                                     | AN      | [XX.] <sup>12</sup>                                                                                 | Looks at NurseAN.                                                                                              |                                                                                 |
|                                                                         |         |                                                                                                     |                                                                                                                |                                                                                 |
| <b>Part 2, after the anaesthetist's involvement in the CT-decision.</b> |         |                                                                                                     |                                                                                                                |                                                                                 |
| 298                                                                     | EDphys1 | OK. Is it an indication for inducing X hypothermia [then to] <sup>13</sup> to do a CT of the brain? |                                                                                                                |                                                                                 |
| 299                                                                     | Phys2   | [No.] <sup>13</sup>                                                                                 |                                                                                                                |                                                                                 |
| 300                                                                     | Phys3   | [No.] <sup>13</sup>                                                                                 |                                                                                                                |                                                                                 |
| 301                                                                     | AN      | No.                                                                                                 | Straightens back, lets go of the patient's left hand, turns and walks towards Phys1, EDphys1, Phys2 and Phys3. | Phys2 outside the video-frame. Phys1, and Phys2 turn towards AN. Phys1 is nods. |
| 302                                                                     | Phys2   | No (.) no. I -                                                                                      |                                                                                                                |                                                                                 |
| 303                                                                     | AN      | It's more out of- If there's doubt about the diagnosis [X] <sup>14</sup>                            | Moves towards EDphys1 and Phys3.                                                                               |                                                                                 |
| 304                                                                     | NurseAN | [It is bleeding] <sup>14</sup> in the mouth here.                                                   | Suctions secretion from the patient's mouth.                                                                   |                                                                                 |
| 305                                                                     | Phys2   | Sedated. Get him up to the ICU.                                                                     | Looks at AN.                                                                                                   | Phys1 and Phys3 look alternately at AN and Phys2.                               |
| 306                                                                     | AN      | Yes, but X XX.                                                                                      | Looks at Phys2.                                                                                                |                                                                                 |

|     |              |                                                                                                                                                                                                                      |                                                    |                                                                                                                                       |
|-----|--------------|----------------------------------------------------------------------------------------------------------------------------------------------------------------------------------------------------------------------|----------------------------------------------------|---------------------------------------------------------------------------------------------------------------------------------------|
| 307 | Phys1        | X[X] <sup>15</sup>                                                                                                                                                                                                   | Stands facing<br>EDphys1.                          | Phys3 stands facing<br>EDphys1.                                                                                                       |
| 308 | Phys2        | [Yes.] <sup>15</sup> True, that is more<br>important.                                                                                                                                                                | Looks at AN.                                       | Phys1 nods and turns<br>towards the bed                                                                                               |
| 309 | NurseAN      | Blood in the tube.                                                                                                                                                                                                   | Suctions secretion<br>from the patient's<br>mouth. |                                                                                                                                       |
| 310 | AN           | But there's no rush to get<br>him up to the ICU either.                                                                                                                                                              | Looks at Phys2.                                    | EDphys2 looks at<br>NurseAN. EDnurse1 is<br>working with the ECG.<br>The other team members<br>are standing at the foot of<br>the bed |
| 311 | Phys2        | What?                                                                                                                                                                                                                |                                                    |                                                                                                                                       |
| 312 | AN           | There's no rush to get him<br>[up to the ICU either] <sup>16</sup>                                                                                                                                                   | Looks at Phys2.                                    | Phys3 leans forward<br>towards AN while AN is<br>speaking                                                                             |
| 313 | EDnurse<br>1 | [Out of paper.] <sup>16</sup>                                                                                                                                                                                        | Looks at ECG-<br>machine.                          |                                                                                                                                       |
| 314 | Phys2        | [No.] <sup>16</sup> It's just- But is he<br>awake X or isn't he. We're<br>going to get him into<br>hypothermia after all just get<br>him up to the ICU. (2) If<br>[you want to get him to CT<br>then-] <sup>17</sup> | Looks at AN, Phys1<br>and Phys3.                   | AN is looks at Phys2 and<br>nods while she is talking.                                                                                |
| 315 | NurseAN      | Did anyone hear that? [Is<br>there anyone who heard] <sup>17</sup><br>[that there's blood in the<br>tube?] <sup>18</sup>                                                                                             | Looks at AN.                                       |                                                                                                                                       |

|     |         |                                                                                                                                                                                 |                                                                     |                                           |
|-----|---------|---------------------------------------------------------------------------------------------------------------------------------------------------------------------------------|---------------------------------------------------------------------|-------------------------------------------|
| 316 | AN      | [No but whether we should do a CT scan or not] <sup>18</sup> that's one thing. But there is no rush to get [X] <sup>19</sup>                                                    | Looks at Phys2.                                                     |                                           |
| 317 | EDphys2 | [Blood in the tube.] <sup>19</sup>                                                                                                                                              | Looks at EDphys1.                                                   |                                           |
| 318 | Phys2   | [No, it's not] <sup>19</sup> like you have to sprint up to the ICU [but XX] <sup>20</sup> is a CT scan necessary?                                                               | Takes a step towards AN and lifts up both hands as she speaks       | EDnurse1 loads the ECG machine with paper |
| 319 | EDphys1 | [What?] <sup>20</sup>                                                                                                                                                           |                                                                     |                                           |
| 320 | EDphys2 | [Blood in the tube.] <sup>20</sup>                                                                                                                                              | Looks at EDphys1 and points back towards the patient with his thumb | AN walks up to NurseAN                    |
| 321 | EDphys1 | [Blood in the tube.] <sup>20</sup>                                                                                                                                              |                                                                     |                                           |
| 322 | NurseAN | [Look NAME (AN)] <sup>21</sup>                                                                                                                                                  | Looks at AN and continues suctioning                                |                                           |
| 323 | Phys3   | [What a CT can tell us] <sup>21</sup> is whether there are major signs of anoxic brain injury. And maybe whether there's an additional [component such as when -] <sup>22</sup> | Alternates between looking at Phys2 and at the patient.             |                                           |
| 324 | Phys1   | [Blood gas. Has that been taken] <sup>22</sup> then?                                                                                                                            | Looks at EDphys2.                                                   |                                           |
| 325 | EDphys2 | No.                                                                                                                                                                             |                                                                     |                                           |
| 326 | Phys3   | [XX] <sup>23</sup>                                                                                                                                                              | Looks at EDphys2 and then turns toward Phys1.                       |                                           |
| 327 | Phys2   | XX blood gas [X.] <sup>23</sup>                                                                                                                                                 | Shakes head slightly.                                               |                                           |

|     |              |                                                                                                                                                                                                               |                                                            |                                                                                                       |
|-----|--------------|---------------------------------------------------------------------------------------------------------------------------------------------------------------------------------------------------------------|------------------------------------------------------------|-------------------------------------------------------------------------------------------------------|
| 328 | Phys1        | It would have been helpful to have a blood gas-                                                                                                                                                               |                                                            |                                                                                                       |
| 329 | EDnurse<br>1 | [He] <sup>23</sup> is reacting a bit with his (.) hand here you see.                                                                                                                                          |                                                            |                                                                                                       |
| 330 | EDphys2      | Yes [X. Could you get] <sup>24</sup> [XX?] <sup>25</sup>                                                                                                                                                      | Looks at Phys1.<br><br>Points towards the emergency table. | Phys1 goes to the emergency table and gets equipment for blood gas testing which he gives to EDphys2. |
| 331 | AN           | [Isn't there any Propofol left?] <sup>24</sup> (2) [Give XX at least.] <sup>25</sup> (1) Have you got any Propofol then? Don't [we have anything?] <sup>26</sup> (.) [Have you got Propofol? X] <sup>27</sup> | Stands beside the anaesthesia table and looks at NurseAN.  |                                                                                                       |
| 332 | NurseAN      | [What?] <sup>26</sup> (2) [It's over there] <sup>27</sup> [Over there on the table] <sup>28</sup>                                                                                                             | Points towards the emergency table.                        | EDnurse1 takes out the Propofol syringe and hands it to NurseAN who passes it on to AN                |
| 333 | Phys3        | [X looks as though it's one of those-] <sup>24</sup> [One of those two.] <sup>25</sup> And if there's no (2) [risk of XX] <sup>26</sup> [that he's not cooled down so quickly-] <sup>27</sup>                 | Stands together with Phys2 at the left side of the bed.    |                                                                                                       |
| 334 | Phys2        | [Yes but-] <sup>28</sup> (2) XX perhaps but that's exactly what is- Because he's not sedated at all (.) is he?                                                                                                |                                                            | Phys3's telephone rings.                                                                              |

|     |         |                                                                                                                           |                                              |                                       |
|-----|---------|---------------------------------------------------------------------------------------------------------------------------|----------------------------------------------|---------------------------------------|
| 335 | AN      | [XX] <sup>29</sup>                                                                                                        | Administers Propofol to the patient          |                                       |
| 336 | EDphys1 | [No. Yes] <sup>29</sup> yes that is he has of course- was of course sedated during intubation then but [X-] <sup>30</sup> |                                              |                                       |
| 337 | Phys2   | [Yes yes] <sup>30</sup> but nothing more than that?                                                                       |                                              |                                       |
| 338 | NurseAN | Oh yes. [XX] <sup>31</sup> [XX] <sup>32</sup>                                                                             | Looks downward at the suction catheter       |                                       |
| 339 | Phys3   | [Hello.] <sup>31</sup>                                                                                                    | Answers the telephone.                       |                                       |
| 340 | EDphys1 | [He is moving his extremities after all] <sup>31</sup>                                                                    |                                              |                                       |
| 341 | Phys2   | [It doesn't matter] <sup>32</sup> because it doesn't mean anything                                                        |                                              |                                       |
| 342 | Phys3   | The answer is no. @ Thank you.                                                                                            | Answers the telephone. Stands next to Phys2. |                                       |
| 343 | Phys2   | But (.) XX make a decision. If we're going to get him to CT then we get him to CT. Not [XX] <sup>33</sup>                 | Shakes head. Looks out into the air.         |                                       |
| 344 | EDphys1 | [Then we'll get] <sup>33</sup> that across the corridor here and then we'll go up.                                        |                                              |                                       |
| 345 | Phys3   | What?                                                                                                                     | Looks at EDphys1.                            |                                       |
| 346 | EDphys1 | The alternative is to take the CT now here and then we'll take him up to the ICU.                                         |                                              | AN is placing a gastrointestinal tube |

|     |              |                                                       |                                      |  |
|-----|--------------|-------------------------------------------------------|--------------------------------------|--|
| 347 | Phys3        | My recommendation is CT<br>now if we can get it fast. |                                      |  |
| 348 | EDnurse<br>3 | Shall I go and check with<br>CT now?                  | Standing outside the<br>video frame. |  |
| 349 | EDphys1      | Yes.                                                  |                                      |  |
