# Supplementary material
Source: HighWire-hosted journal article supplement (https://bmjopen.bmj.com/content/8/11/e023749)
Supplement: inline-supplementary-material-3 [file inline-supplementary-material-3.pdf]

## Appendix 3, Excerpt C

**Abbreviations:** Phys1-2: Physicians from internal medicine department, EDphys: Physician working in the emergency department, EDnurse1-3: Nurses working in the emergency department, AN: Anaesthetist, NurseAN: Nurse anaesthetist. Radiographer.

**Transcript key:** X: word not audible, XX: words not audible, [words]<sup>2</sup>: overlapping speech (the numbers indicate the order of the nearby overlap), -: unfinished words or sentences, (.): micropause, (3): seconds pause.

**Situation:** Patient is > 70 years old, living at home. Indication for hospital admission: syncope. The patient was awake and adequate with no pain at arrival. The anaesthetist is performing an ultrasound and preparing to place a central venous line in the patient's neck area. ED nurse 1 is preparing to insert a urine catheter, and the ED physician is standing beside the bed. The nurse anaesthetist is securing the patient's arterial cannula, and physicians 1 and 2 are standing beside ED nurse 2 at the logging desk. The bed is not functioning properly and cannot be tilted head down for the central venous line procedure, and a chest X-ray has just been taken.

| Utterance number | Speaker | Utterance                                                                            | Speakers action                                                                        | Other action                                                      |
|------------------|---------|--------------------------------------------------------------------------------------|----------------------------------------------------------------------------------------|-------------------------------------------------------------------|
| 311              | AN      | [Her venous volume] <sup>1</sup> is good. The question is if it's simply turned off- | Looks at the ultrasound screen to be used during insertion of the central venous line. | EDphys leans forward to look at the same ultrasound screen as AN. |
| 312              | EDphys  | Is it cardiogenic shock?                                                             | Looks at AN.                                                                           |                                                                   |
| 313              | AN      | Well-. But, I mean. If you take- If you look at the vein here. Can you see it?       |                                                                                        |                                                                   |
| 314              | EDphys  | Yes, I see. It's enor[mous] <sup>2</sup> .                                           | Looks briefly at the patient.                                                          |                                                                   |
| 315              | AN      | [Yes.] <sup>2</sup> Yes.                                                             |                                                                                        |                                                                   |
| 316              | EDphys  | She is actually lying well X as well.                                                |                                                                                        |                                                                   |
| 317              | AN      | That might [indicate that she has-] <sup>3</sup>                                     |                                                                                        |                                                                   |

|     |               |                                                                                                                                                                                                 |                                                                                       |                                                                                                                                                     |
|-----|---------------|-------------------------------------------------------------------------------------------------------------------------------------------------------------------------------------------------|---------------------------------------------------------------------------------------|-----------------------------------------------------------------------------------------------------------------------------------------------------|
| 318 | EDphys        | [We could look at the] <sup>3</sup> [vena cava also.] <sup>4</sup>                                                                                                                              |                                                                                       |                                                                                                                                                     |
| 319 | Radio-grapher | [Thorax is fine at least] <sup>4</sup> or at least technically speaking. Must look at the image yourself. Take this away now. Anyone who could help to lift a bit? (3) [Thank you] <sup>5</sup> | Looks towards EDphys. Removes the X-ray cartridge beneath the patient's back.         | Phys1 approaches and lifts the patient on the opposite side of the radiographer. AN looks at the X-ray image on the screen at the back of the room. |
| 320 | AN            | She does have a [wi-] <sup>5</sup> . [She has- ] <sup>6</sup> (2) [I think ehm-] <sup>7</sup> Come and have a look here (3). What's his name again-?                                            | Switches off the alarm on the monitor. Looks at EDphys. Beckons with her hand, "here" | EDphys stands with his back to AN at the foot of the bed and works at ultrasound machine 2.                                                         |
| 321 | EDphys        | [Would you fetch more gel?] <sup>6</sup>                                                                                                                                                        | Looks at EDnurse2, who is standing at the logging desk. Then turns towards AN         |                                                                                                                                                     |
| 322 | X             | I don't know where [XX] <sup>7</sup>                                                                                                                                                            |                                                                                       |                                                                                                                                                     |
| 323 | X             | The small heating cabinet innermost over there.                                                                                                                                                 |                                                                                       |                                                                                                                                                     |
| 324 | NurseAN       | NAME (patient)? Are you awake?                                                                                                                                                                  | Secures the patient's arterial cannula and looks briefly at the patient               |                                                                                                                                                     |
| 325 | EDphys        | XX                                                                                                                                                                                              | Looks at AN and brings ultrasound machine 2 and rolls it towards the bed              |                                                                                                                                                     |
| 326 | AN            | Come and look at the X-ray here. The mediastinum is widened.                                                                                                                                    | Returns to the screen with the X-ray image                                            | EDphys walks around the bed on AN's right-hand side. Together with Phys1 and Phys2                                                                  |

|     |               |                                                                             |                                                                  |                                                                                                                            |
|-----|---------------|-----------------------------------------------------------------------------|------------------------------------------------------------------|----------------------------------------------------------------------------------------------------------------------------|
| 327 | Patient       | Ouch.                                                                       |                                                                  |                                                                                                                            |
| 328 | NurseAN       | Was it your hand that was hurting?                                          |                                                                  | AN points at the X-ray screen                                                                                              |
| 329 | Patient       | [Yes XX] <sup>1</sup>                                                       |                                                                  |                                                                                                                            |
| 330 | AN            | [I don't know if there's something ongoing] <sup>1</sup> X just-            | Looks at EDphys pointing to the X-ray screen                     |                                                                                                                            |
| 331 | EDphys        | Yes                                                                         | Looks at the X-ray screen.                                       | Phys1 and 3 look over EDphys's shoulder. AN walks to the patient monitor and pauses the alarm, then turns to EDphys again. |
| 332 | AN            | Yes. Eeh that is, it is X.                                                  | Standing together with EDphys, Phys1 and Phys2.                  |                                                                                                                            |
| 333 | NurseAN       | Are you going to take more here?                                            | Taking off her lead apron Looks at the radiographer.             | Radiographer is moving the X-ray scanner.                                                                                  |
| 334 | Radio-grapher | [Finished, yes] <sup>2</sup>                                                | Pushes the X-ray scanner back into place                         | EDphys shrugs his shoulders slightly when he turns to walk towards Phys1 and Phys2                                         |
| 335 | AN            | [Now her blood pressure is falling.] <sup>2</sup> Do we have some pressor-? | Looks at the patient-monitor.                                    | EDnurse2 is standing with ultrasound -gel in his hand.                                                                     |
| 336 | NurseAN       | What would you like?                                                        | Takes off the lead apron and walks around the bed to put it away |                                                                                                                            |
| 337 | AN            | Eeeh. What's the pulse rate then?                                           | Unpacks the kit for central venous line placement.               |                                                                                                                            |
| 338 | Phys1         | [XX] <sup>3</sup>                                                           | Walks behind EDphys, turning his                                 |                                                                                                                            |

|         |                                                                                                                                                                                                                   |                                                                                                                                          |                                                                                                                                 |                                                                                                             |
|---------|-------------------------------------------------------------------------------------------------------------------------------------------------------------------------------------------------------------------|------------------------------------------------------------------------------------------------------------------------------------------|---------------------------------------------------------------------------------------------------------------------------------|-------------------------------------------------------------------------------------------------------------|
|         |                                                                                                                                                                                                                   |                                                                                                                                          | head back to look at Phys2                                                                                                      |                                                                                                             |
| 339     | NurseAN                                                                                                                                                                                                           | I've got phenylephrine, ephedrine and [epinephrine] <sup>3</sup>                                                                         | Walks back around the bed and to the anaesthesia table next to AN at the head of the bed..                                      | EDphys stands at the foot of the bed next to the ultrasound machine 2.                                      |
| 340     | AN                                                                                                                                                                                                                | [Give her] <sup>3</sup> [ephedrine now] <sup>4</sup>                                                                                     | Looks at the patient monitor. Continues unpacking equipment as she speaks.                                                      |                                                                                                             |
| 341     | Phys2                                                                                                                                                                                                             | [Could it mean anything other than XX?] <sup>4</sup>                                                                                     | Walks up to EDphys, behind Phys1.                                                                                               |                                                                                                             |
| 342     | NurseAN                                                                                                                                                                                                           | X                                                                                                                                        | stands next to the anaesthesia table next to AN.                                                                                |                                                                                                             |
| 343     | EDphys                                                                                                                                                                                                            | Then I will- (2) Chest X-ray shows widened mediastinum. So, we must suspect there's an aortic dissection causing her low blood pressure. | Stands at the foot of the bed. Looks first at EDnurse2, who is standing behind him, then turns towards the room. Talking aloud. |                                                                                                             |
| 344-363 | AN asks for a gauze mask. EDphys seeks supplementary information from the patient and then prepares for the ultrasound examination of vena cava. EDnurse1 informs the patient about inserting the urine catheter. |                                                                                                                                          |                                                                                                                                 |                                                                                                             |
| 364     | AN                                                                                                                                                                                                                | We are working a bit on (.)-. A bit from different angles here now. (4) Eeh. [Look at the liver] <sup>6</sup> then eeh vena cava.        | Putts on the gauze mask.                                                                                                        | EDphys examines the thorax and abdomen using ultrasound. Phys1 leaves the video frame, walking to the left. |
| 365     | X                                                                                                                                                                                                                 | [XX] <sup>6</sup>                                                                                                                        |                                                                                                                                 | Phys2 stands next to Phys1 at the outer edge of the video frame (left)                                      |
| 366     | EDphys                                                                                                                                                                                                            | I'll look at that too.                                                                                                                   |                                                                                                                                 |                                                                                                             |

|     |           |                                                                                                                                                                                        |                                                                                                                                             |                                                                                                           |
|-----|-----------|----------------------------------------------------------------------------------------------------------------------------------------------------------------------------------------|---------------------------------------------------------------------------------------------------------------------------------------------|-----------------------------------------------------------------------------------------------------------|
| 367 | AN        | Yes. (1) I'm going to insert a central venous line, so we could start with norepinephrine if necessary while- because if it gets XX then it is after all- (2) [But then-] <sup>7</sup> |                                                                                                                                             | EDnurse1 is preparing for placing a urinary catheter.                                                     |
| 368 | NurseAN   | [Do you want ephedrine?] <sup>7</sup>                                                                                                                                                  | Turns towards AN.                                                                                                                           |                                                                                                           |
| 369 | AN        | Yes. But someone mix norepinephrine in like a eeh constant infusion pump?                                                                                                              | Does not raise her eyes from what she is doing while she is speaking                                                                        | NurseAN walks around the bed with medication                                                              |
| 370 | EDnurse 2 | Are you inserting one with a temperature sensor?                                                                                                                                       | Standing at the logging desk.                                                                                                               | EDnurse1 turns towards EDnurse2.                                                                          |
| 371 | EDnurse 1 | No sensor on the one I have here now, no. [Did you] <sup>8</sup> want one?                                                                                                             | Turns toward EDnurse2, who is standing at the logging desk.                                                                                 |                                                                                                           |
| 372 | EDnurse 2 | [Not?] <sup>8</sup> XX                                                                                                                                                                 |                                                                                                                                             |                                                                                                           |
| 373 | EDnurse 1 | Would you go and get one then?                                                                                                                                                         |                                                                                                                                             |                                                                                                           |
| 374 | EDnurse 2 | Yes                                                                                                                                                                                    |                                                                                                                                             |                                                                                                           |
| 375 | AN        | Let's see-                                                                                                                                                                             |                                                                                                                                             |                                                                                                           |
| 376 | EDphys    | Doesn't it look widened here then?                                                                                                                                                     | Points at his ultrasound screen.                                                                                                            | Phys1 and Phys2 stand next to EDphys and look at the ultrasound screen. Phys1 and Phys2 shake their heads |
| 377 | NurseAN   | 5 milligram ephedrine given                                                                                                                                                            | Adjusts the roller clamp on the IV administration set for the infusion bag connected to the intravenous catheter on the patient's left hand | EDnurse3 enters.                                                                                          |

|         |                                                                                                                  |                                                                                                                                       |                                                                  |                                                                                             |
|---------|------------------------------------------------------------------------------------------------------------------|---------------------------------------------------------------------------------------------------------------------------------------|------------------------------------------------------------------|---------------------------------------------------------------------------------------------|
| 378     | AN                                                                                                               | Then we must keep an eye on XX. Let's see- Take a deep [breath] <sup>1</sup>                                                          | Looks to the patient monitor and touches the screen              |                                                                                             |
| 379-393 | AN asks NurseAN to help her to put on a sterile gown. EDphys says he can see vena cava on the ultrasound screen. |                                                                                                                                       |                                                                  |                                                                                             |
| 394     | EDphys                                                                                                           | The vena cava inferior is hardly moving. [So it] <sup>1</sup> is obstructive or cardiogenic shock.                                    | Looks at AN                                                      |                                                                                             |
| 395     | AN                                                                                                               | [XX] <sup>1</sup> (3) Yes.(1) But is it-. Should a pericardiocentesis be done, or is it-? (2) Let's see-                              | Waves her hands and turns toward NurseAN.                        | NurseAN stands at the cabinet at the back of the room EDphys looks at the ultrasound screen |
| 396     | EDnurse 3                                                                                                        | XX                                                                                                                                    | Brings new urinary catheter                                      |                                                                                             |
| 397     | EDnurse 1                                                                                                        | Yes. Could you help me with this [XX] <sup>2</sup> NAME (EDnurse3)                                                                    | Looks at EDnurse3                                                | EDnurse3 helps the patient bending her knees.                                               |
| 398     | AN                                                                                                               | [Sterile glows?] <sup>2</sup>                                                                                                         |                                                                  |                                                                                             |
| 399     | EDnurse 3                                                                                                        | XX. Someone is fetching them.                                                                                                         | Looks at EDnurse3, then EDnurse1.                                | NurseAN walks towards the foot of the bed                                                   |
| 400     | AN                                                                                                               | Someone's fetching them, OK.                                                                                                          |                                                                  | EDnurse2 brings sterile gloves, which he gives to NurseAN                                   |
| 401     | NurseAN                                                                                                          | Bring XX with X and two of X                                                                                                          | Takes the package of sterile gloves from EDnurse2 and goes to AN |                                                                                             |
| 402     | AN                                                                                                               | Remind me to phone X. (2) Has a thoracic surgeon been called? Or a thoracic anaesthetist- to come and assess- (3) In terms of status. | Opens the glove package                                          | EDnurse1 and EDnurse3 insert the urinary catheter                                           |
| 403     | EDphys                                                                                                           | Yes.                                                                                                                                  |                                                                  |                                                                                             |
