# Supplementary material
Source: HighWire-hosted journal article supplement (https://bmjopen.bmj.com/content/8/11/e023749)
Supplement: inline-supplementary-material-4 [file inline-supplementary-material-4.pdf]

## Appendix 4, Excerpt D

**Abbreviations:** Phys1-2: Physicians from internal medicine department, PhysTh2: Physician from thoracic surgical department, EDnurse1-3: Nurses working in the emergency department, AN: Anaesthetist, NurseAN: Nurse anaesthetist, NurseAN student: Nurse anaesthetist student, Radiographers 1-2.

**Transcript key:** X: word not audible, XX: words not audible, [words]<sup>2</sup>: overlapping speech (the numbers indicate the order of the nearby overlap), –: unfinished words or sentences, (.): micropause, (3): seconds pause.

**Situation:** Patient is > 70 years old, living at home. Indication for hospital admission: cardiac arrest. CPR and ROSC prior to hospital transport. The patient was unconscious but breathing spontaneously at ED arrival and the airway was secured with a supraglottic airway device. During this phase of work, physician 1 is standing beside ED nurse 2 at the logging-desk and two physicians from the thoracic surgical department are called and stand a small distance from the bed. Two radiographers are standing in the back of the room. The anaesthetist is standing near the patient's head and the nurse anaesthetist, nurse anaesthetist student, and ED nurse 1 stand close to the anaesthetist.

| Utterance number | Speaker        | Utterance                                                                      | Speakers action                                                     | Other action                                                 |
|------------------|----------------|--------------------------------------------------------------------------------|---------------------------------------------------------------------|--------------------------------------------------------------|
| 186              | AN             | X Haven't you taken the chest X-ray yet?                                       | Looks at the radiographers standing behind the head end of the bed. |                                                              |
| 187              | Radio-grapher1 | No. We haven't taken it yet. Shall [we-] <sup>1</sup>                          | Looks at AN.                                                        |                                                              |
| 188              | AN             | [NAME (Phys1)] <sup>1</sup> . (1) [Should we take a chest X-ray?] <sup>2</sup> | Turns towards Phys1.                                                | Phys1 standing at the logging desk with his back to the bed. |
| 189              | Phys1          | Yes.                                                                           | Turns towards AN and walks towards the bed while he answers.        |                                                              |

|         |                                                                                                |                                                                                                                  |                                                             |                                                                                                                        |
|---------|------------------------------------------------------------------------------------------------|------------------------------------------------------------------------------------------------------------------|-------------------------------------------------------------|------------------------------------------------------------------------------------------------------------------------|
| 190     | Radio-grapher1                                                                                 | [Should he have any X-rays?] <sup>2</sup>                                                                        |                                                             |                                                                                                                        |
| 191     | Phys1                                                                                          | Yes.                                                                                                             | Looks at AN.                                                |                                                                                                                        |
| 192     | AN                                                                                             | Shall we take it now before we intubate him?                                                                     | Looks at Phys1.                                             |                                                                                                                        |
| 193     | Phys1                                                                                          | Yes, we'll do that. We'll take a chest X-ray.                                                                    | Looks at AN.                                                | Radiographers start getting ready.                                                                                     |
| 194     | AN                                                                                             | X cuff-syringe have you seen it? [Isn't it somewhere here?] <sup>3</sup>                                         | Looks at EDnurse1 then turns towards the monitor.           |                                                                                                                        |
| 195     | EDnurse1                                                                                       | [A cuff syringe, OK.] <sup>3</sup> (1) [Can just take one like this then, can't you? (.) What XXX?] <sup>4</sup> | Gets a syringe from the emergency table and goes towards AN | Radiographer 2 moves the X-ray equipment suspended from the ceiling. Radiographer 1 pushes the patient's bed slightly. |
| 196-202 | Radiographer1 and 2 speaks about preparations; how to position the X-ray unit and the patient. |                                                                                                                  |                                                             |                                                                                                                        |
| 203     | AN                                                                                             | Take out this [then XX] <sup>6</sup>                                                                             | Looks to NurseAN.                                           |                                                                                                                        |
| 204     | Radio-grapher1                                                                                 | [Help me to] <sup>6</sup> move. Could you [help me a bit] <sup>7</sup> on that side?                             |                                                             |                                                                                                                        |
| 205     | NurseAN                                                                                        | [What?] <sup>7</sup>                                                                                             | Looks at AN.                                                |                                                                                                                        |
| 206     | AN                                                                                             | We will [take that XX] <sup>8</sup>                                                                              | Stands by the head of the bed.                              |                                                                                                                        |
| 207     | Radio-grapher2                                                                                 | [Yes. Will just see] <sup>8</sup> how far down we need it.                                                       | Adjusts the position of the X-ray unit.                     |                                                                                                                        |
| 208     | NurseAN                                                                                        | Take out -                                                                                                       |                                                             |                                                                                                                        |
| 209-212 | EDnurse2 asks for information for documentation.                                               |                                                                                                                  |                                                             |                                                                                                                        |
| 213     | AN                                                                                             | What is this man's name?                                                                                         | Removes the patient's I-gel airway                          |                                                                                                                        |
| 214     | NurseAN student                                                                                | His name is NAME (patient).                                                                                      | Looks at AN.                                                | NurseAN is looks at NurseAN student.                                                                                   |

|     |                |                                                                            |                                                                                                |                                                                                                                                                       |
|-----|----------------|----------------------------------------------------------------------------|------------------------------------------------------------------------------------------------|-------------------------------------------------------------------------------------------------------------------------------------------------------|
| 215 | NurseAN        | NAME (patient) NAME (patient)                                              | Bends over the patient.<br>Speaks loudly                                                       |                                                                                                                                                       |
| 216 | AN             | X suction. Can you find a suction device for me?                           | Looks at EDnurse1.                                                                             |                                                                                                                                                       |
| 217 | EDnurse1       | Yes.                                                                       | Goes to find suction device.                                                                   |                                                                                                                                                       |
| 218 | Radio-grapher2 | Then it's ready for chest X-ray.                                           | Moves away from the patient's bed.                                                             | Phys1 moves away from the bed                                                                                                                         |
| 219 | AN             | Then you need to hurry up.                                                 | Leans over the patient's head.                                                                 |                                                                                                                                                       |
| 220 | Radio-grapher1 | You must move your head away or you'll be included in the picture.         | To AN                                                                                          |                                                                                                                                                       |
| 221 | Radio-grapher2 | X-ray taken.                                                               | Goes back to the bed.                                                                          | Phys1 goes up to the bed.                                                                                                                             |
| 222 | EDnurse2       | X-ray taken.                                                               |                                                                                                |                                                                                                                                                       |
| 223 | AN             | NAME (patient) (6) ehh.<br>No contact NAME (Phys1) I think we'll intubate. | Looks at Phys1, who is moving towards the X-ray image behind the patient's bed.                | Phys1 turns and looks at AN nodding.<br>NurseAN gets a bag-valve-mask from the wall behind the head end of the bed. The patient monitor alarm starts. |
| 224 | NurseAN        | Intubate? [Do you want that?] <sup>1</sup>                                 | Puts the bag-valve-mask beside the patient's shoulder and walks over to the anaesthesia table. |                                                                                                                                                       |
| 225 | AN             | [The question is if I should-] <sup>1</sup>                                |                                                                                                |                                                                                                                                                       |
| 226 | EDnurse1       | 85 in saturation.                                                          |                                                                                                |                                                                                                                                                       |
| 227 | EDnurse2       | 85 in saturation.                                                          |                                                                                                |                                                                                                                                                       |

|     |                 |                                                                 |                                                                                                                                                   |                                                                                                       |
|-----|-----------------|-----------------------------------------------------------------|---------------------------------------------------------------------------------------------------------------------------------------------------|-------------------------------------------------------------------------------------------------------|
| 228 | AN              | Must have suction now!                                          | Turns toward EDnurse1.                                                                                                                            | EDnurse1 is setting up the suction unit that is standing on the floor.                                |
| 229 | EDnurse1        | Yes, but I've got no adaptor.                                   | Connects the suction unit standing on the floor.                                                                                                  | AN walks towards the patient monitor but turns back.                                                  |
| 230 | AN              | I need it now! (8) [can you watch out for his arm] <sup>2</sup> | Moves from the patient's side to behind the head end of the bed. Has to climb between cables hanging between the patient monitor and the patient. | EDnurse1 is standing next to AN. Suctions secretion from the patient's mouth with a suction catheter. |
| 231 | Phys1           | [I think we must have a CT scan.] <sup>2</sup>                  | Stands at the X-ray screen looking at Radiographer2.                                                                                              | PhysTh2 walks towards Phys1.                                                                          |
| 232 | Radio-grapher 2 | XX requisition.                                                 | Standing next to Phys1.                                                                                                                           |                                                                                                       |
| 233 | EDnurse1        | Yes.                                                            |                                                                                                                                                   |                                                                                                       |
| 234 | AN              | Suction in the mouth.                                           | Looks down at the patient.                                                                                                                        |                                                                                                       |
| 235 | Phys1           | It looks as- a bit like-                                        | Looks at the screen showing the X-ray images                                                                                                      | PhysTh2 stands next to Phys1 and look at the screen showing X-ray images.                             |
| 236 | PhysTh2         | XX it looks [as though there's XX] <sup>3</sup>                 | Looks at Phys1.                                                                                                                                   |                                                                                                       |
| 237 | AN              | [Suxamethonium and fentanyl]. <sup>3</sup>                      | Turns towards NurseAN when he is talking about medications.                                                                                       |                                                                                                       |
| 238 | Phys1           | [Yes, mhm] <sup>3</sup> It might well be that too.              |                                                                                                                                                   |                                                                                                       |

|     |                 |                                                                                  |                                                                               |                                         |
|-----|-----------------|----------------------------------------------------------------------------------|-------------------------------------------------------------------------------|-----------------------------------------|
| 239 | NurseAN         | NAME (NurseAN student)<br>Insert a stylet in the tube here.                      | Looks at the NurseAN student who is standing by the anaesthesia machine.      |                                         |
| 240 | NurseAN student | Yes. A stylet?                                                                   |                                                                               |                                         |
| 241 | NurseAN         | A stylet.                                                                        |                                                                               |                                         |
| 242 | Phys2           | Is there something I should requisition?                                         | Walks towards Phys1.                                                          |                                         |
| 243 | AN              | XX [turn up-] <sup>4</sup>                                                       | Holds the bag-valve-mask to his ear then points towards the oxygen flowmeter. | EDnurse1 turns up the oxygen flowmeter. |
| 244 | Phys1           | [Requisition a CT] <sup>4</sup> chest (2) and a [CT lung and head.] <sup>5</sup> | Facing Phys2.                                                                 |                                         |
